# Supplementary material for: Increased Biomass and Polyhydroxybutyrate Production by Synechocystis sp. PCC 6803 Overexpressing RuBisCO Genes
Source: MDPI journal article supplement (doi:10.3390/ijms24076415), 2023-03-29

## Supplementary Information

**Table S1** Primers used in this study

| Target gene     | Name              | Sequence 5' to 3'               | Purpose of primers | Product size (bp) | T <sub>m</sub> (°C)/Cycles |
|-----------------|-------------------|---------------------------------|--------------------|-------------------|----------------------------|
| <i>rbcL</i>     | rbcL_F            | GGACTAGTATGGTACAAGCCAAAGC       | PCR                | 1413              | 58 °C/30                   |
|                 | rbcL_R            | AAAACCTGCAGTTAGAGGGTATCCATGGC   |                    |                   |                            |
| <i>rbcX</i>     | rbcX_F            | GCTCTAGATTACCGGGTAGAGTGTTTCAT   | PCR / RT-PCR       | 433               | 58 °C/26                   |
|                 | rbcX_R            | GGACTAGTTTATAGGACGGGGGAGAATCGTT |                    |                   |                            |
| <i>rbcS</i>     | rbcS_F            | GGACTAAGTCATCAGCAAGGAAAACCTTTTA | PCR / RT-PCR       | 373               | 58 °C/26                   |
|                 | rbcS_R            | AACTGCACTTAGTAACGGCCTTGGTTTTGG  |                    |                   |                            |
| <i>Uppsba2</i>  | Uppsba2_F         | TGCCTGTCAGCAAAACAACCTT          | PCR                | -                 | 58 °C                      |
| <i>DSpsba2</i>  | DSpsba2_R         | CGAGGGCAATCATCAATTCCG           |                    |                   |                            |
| CM              | CM_F              | GAGTTGATCGGGCACGTAAG            | PCR                | 899               | 58 °C                      |
|                 | CM_R              | CTCGAGGCTTGGATTCTCTCAC          |                    |                   |                            |
| 16S rRNA        | 16S_F             | AGTTCTGACGGTACCTGATGA           | RT-PCR             | 521               | 59 °C/8                    |
|                 | 16S_R             | GTCAAGCCTTGGTAAGGTTCT           |                    |                   |                            |
| RT_ <i>rbcL</i> | RT <i>rbcL</i> _F | GGTATCACCATGGGCTTCGTTGACCT      | RT-PCR             | 411               | 58 °C/30                   |
|                 | RT <i>rbcL</i> _R | AAAACCTGCAGTTAGAGGGTATCCATGGC   |                    |                   |                            |
| RT_ <i>phaA</i> | RT <i>phaA</i> _F | CATGATGGTTTGACGGACAG            | RT-PCR             | 310               | 58 °C/30                   |
|                 | RT <i>phaA</i> _R | AGACTTTCACGGTGGTGTC             |                    |                   |                            |
| RT_ <i>phaB</i> | RT <i>phaB</i> _F | GCTCCATTGTGGCCATTAGT            | RT-PCR             | 255               | 58 °C/26                   |
|                 | RT <i>phaB</i> _R | CAATTCCTCCGGTTTACCA             |                    |                   |                            |
| RT_ <i>phaC</i> | RT <i>phaC</i> _F | GGGCACATTTAGCCTGTGTT            | RT-PCR             | 267               | 58 °C/26                   |
|                 | RT <i>phaC</i> _R | CCCATAATATCGGGCACATC            |                    |                   |                            |
| RT_ <i>phaE</i> | RT <i>phaE</i> _F | GGCCATGGCAGACTATCAAT            | RT-PCR             | 384               | 58 °C/23                   |
|                 | RT <i>phaE</i> _R | TAGCCTGGGTTTGCTTCTGT            |                    |                   |                            |
| RT_ <i>plsX</i> | RT <i>plsX</i> _F | AAGGGGTGGTGGAAATGGAA            | RT-PCR             | 467               | 59 °C/28                   |
|                 | RT <i>plsX</i> _R | AAGTACGTCCCTTCCTTCGG            |                    |                   |                            |
| RT_ <i>plsC</i> | RT <i>plsC</i> _F | TCTCTACCGGGGCTTGAAATG           | RT-PCR             | 508               | 58 °C/32                   |
|                 | RT <i>plsC</i> _R | CGCCTTACCAATGCGAATAGT           |                    |                   |                            |
| RT_ <i>glgX</i> | RT <i>glgX</i> _F | GAGCTTCATCGAGGACGGAA            | RT-PCR             | 360               | 58 °C/26                   |
|                 | RT <i>glgX</i> _R | GCCCGAATTGGGGTTGCGGG            |                    |                   |                            |

**Table S2** The band intensity data detected by Syngene® Gel Documentation (Syngene, Frederick, MD, USA) in Figures 8 and 9.

(A) The band intensity of each gene (transcript level)

| Genes       | Normal BG <sub>11</sub> |                   |                     | BG <sub>11</sub> -N |                   |                     | BG <sub>11</sub> -P |                   |                     | BG <sub>11</sub> -NP |                   |                     |
|-------------|-------------------------|-------------------|---------------------|---------------------|-------------------|---------------------|---------------------|-------------------|---------------------|----------------------|-------------------|---------------------|
|             | WTc                     | OX<br><i>rbcL</i> | OX<br><i>rbcLXS</i> | WTc                 | OX<br><i>rbcL</i> | OX<br><i>rbcLXS</i> | WTc                 | OX<br><i>rbcL</i> | OX<br><i>rbcLXS</i> | WTc                  | OX<br><i>rbcL</i> | OX<br><i>rbcLXS</i> |
| <i>phaA</i> | 0.1                     | 0.7               | 0.7                 | 5.0                 | 6.2               | 5.5                 | 1.0                 | 4.0               | 5.0                 | 2.0                  | 4.0               | 5.5                 |
| <i>phaB</i> | 0.3                     | 0.3               | 0.3                 | 3.0                 | 3.5               | 3.5                 | 0.5                 | 0.5               | 0.5                 | 1.2                  | 4.0               | 3.8                 |
| <i>phaC</i> | 0.2                     | 0.2               | 0.1                 | 2.5                 | 4.0               | 3.2                 | 0.8                 | 0.9               | 1.0                 | 1.0                  | 3.0               | 3.0                 |
| <i>phaE</i> | 0.1                     | 0.2               | 0.2                 | 0.3                 | 0.3               | 0.3                 | 0.3                 | 0.4               | 0.4                 | 0.1                  | 0.1               | 0.1                 |
| <i>plsX</i> | 0.2                     | 0.2               | 0.1                 | 4.0                 | 4.0               | 0.8                 | 0.4                 | 0.8               | 1.8                 | 0.4                  | 0.4               | 0.4                 |
| <i>plsC</i> | 1.2                     | 0.8               | 2.0                 | 2.5                 | 3.0               | 2.0                 | 3.1                 | 3.4               | 3.6                 | 1.2                  | 1.3               | 1.6                 |
| <i>glgX</i> | 0.2                     | 0.2               | 0.2                 | 0.6                 | 2.7               | 2.5                 | 1.0                 | 1.5               | 1.6                 | 1.2                  | 2.0               | 2.5                 |
| <i>16S</i>  | 1.0                     | 1.0               | 1.0                 | 1.0                 | 1.0               | 1.0                 | 1.0                 | 1.0               | 1.0                 | 1.0                  | 0.8               | 0.8                 |

(B) The ratios of band intensity of each gene/*16s*

| Genes       | Normal BG <sub>11</sub> |                   |                     | BG <sub>11</sub> -N |                   |                     | BG <sub>11</sub> -P |                   |                     | BG <sub>11</sub> -NP |                   |                     |
|-------------|-------------------------|-------------------|---------------------|---------------------|-------------------|---------------------|---------------------|-------------------|---------------------|----------------------|-------------------|---------------------|
|             | WTc                     | OX<br><i>rbcL</i> | OX<br><i>rbcLXS</i> | WTc                 | OX<br><i>rbcL</i> | OX<br><i>rbcLXS</i> | WTc                 | OX<br><i>rbcL</i> | OX<br><i>rbcLXS</i> | WTc                  | OX<br><i>rbcL</i> | OX<br><i>rbcLXS</i> |
| <i>phaA</i> | 0.1                     | 0.7               | 0.7                 | 5.0                 | 6.2               | 5.5                 | 1.0                 | 4.0               | 5.0                 | 2.0                  | 5.0               | 6.9                 |
| <i>phaB</i> | 0.3                     | 0.3               | 0.3                 | 3.0                 | 3.5               | 3.5                 | 0.5                 | 0.5               | 0.5                 | 1.2                  | 5.0               | 4.8                 |
| <i>phaC</i> | 0.2                     | 0.2               | 0.1                 | 2.5                 | 4.0               | 3.2                 | 0.8                 | 0.9               | 1.0                 | 1.0                  | 2.8               | 2.9                 |
| <i>phaE</i> | 0.1                     | 0.2               | 0.2                 | 0.3                 | 0.3               | 0.3                 | 0.3                 | 0.4               | 0.4                 | 0.1                  | 0.1               | 0.1                 |
| <i>plsX</i> | 0.2                     | 0.2               | 0.1                 | 4.0                 | 4.0               | 0.8                 | 0.4                 | 0.8               | 1.8                 | 0.4                  | 0.5               | 0.5                 |
| <i>plsC</i> | 1.2                     | 0.8               | 2.0                 | 2.5                 | 3.0               | 2.0                 | 3.1                 | 3.4               | 3.6                 | 1.2                  | 1.6               | 2.0                 |
| <i>glgX</i> | 0.2                     | 0.2               | 0.2                 | 0.6                 | 2.7               | 2.5                 | 1.0                 | 1.5               | 1.6                 | 1.2                  | 2.5               | 3.1                 |

(C) Fold change value of “band intensity ratio of each gene/*16s* under stress” divided by “band intensity ratio of each gene/*16s* under normal condition”, shown in Figure 9.

| Genes       | BG <sub>11</sub> -N |                   |                     | BG <sub>11</sub> -P |                   |                     | BG <sub>11</sub> -NP |                   |                     |
|-------------|---------------------|-------------------|---------------------|---------------------|-------------------|---------------------|----------------------|-------------------|---------------------|
|             | WTc                 | OX<br><i>rbcL</i> | OX<br><i>rbcLXS</i> | WTc                 | OX<br><i>rbcL</i> | OX<br><i>rbcLXS</i> | WTc                  | OX<br><i>rbcL</i> | OX<br><i>rbcLXS</i> |
| <i>phaA</i> | 50.0                | 8.9               | 7.9                 | 10.0                | 5.7               | 7.1                 | 30.0                 | 7.1               | 9.8                 |
| <i>phaB</i> | 9.7                 | 10.9              | 12.5                | 1.6                 | 1.6               | 1.8                 | 3.9                  | 15.6              | 17.0                |
| <i>phaC</i> | 12.5                | 20.0              | 32.0                | 4.0                 | 4.5               | 10.0                | 5.0                  | 14.0              | 29.0                |
| <i>phaE</i> | 3.0                 | 1.5               | 1.5                 | 3.0                 | 2.0               | 2.0                 | 1.0                  | 0.6               | 0.6                 |
| <i>plsX</i> | 20.0                | 20.0              | 8.0                 | 2.0                 | 4.0               | 18.0                | 2.0                  | 2.5               | 5.0                 |
| <i>plsC</i> | 2.1                 | 3.8               | 1.0                 | 2.6                 | 4.3               | 1.8                 | 1.0                  | 2.0               | 1.0                 |
| <i>glgX</i> | 3.0                 | 13.5              | 12.5                | 5.0                 | 7.5               | 8.0                 | 6.0                  | 12.5              | 15.6                |

**Figure S1 :** Agarose gel electrophoresis of RT-PCR product of *rbcL* transcript in *Synechocystis sp.* PCC 6803 grown under normal BG<sub>11</sub> condition, shown in **Figure 2D**. The *16s* rRNA transcript was used as the reference.

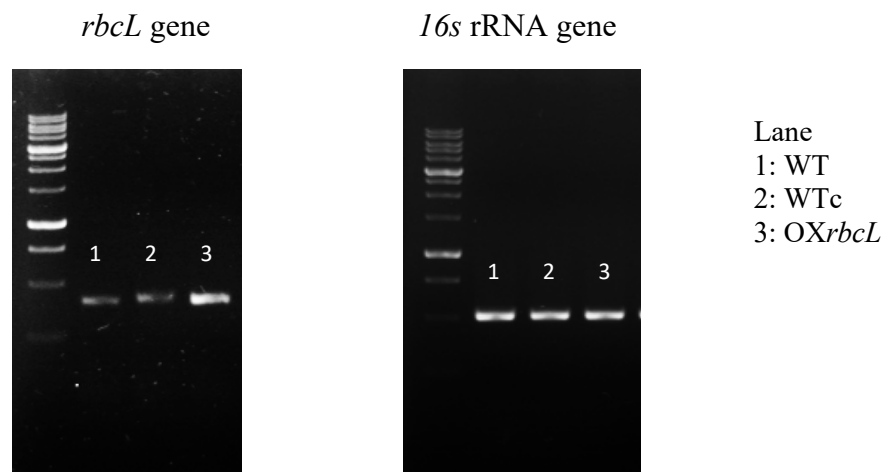

**Figure S2 :** Agarose gel electrophoresis of RT-PCR product of *rbcL*, *rbcX*, *rbcS* transcripts in *Synechocystis sp.* PCC 6803 grown under normal BG<sub>11</sub> condition, shown in **Figure 2D**. The *16s* rRNA transcript was used as the reference.

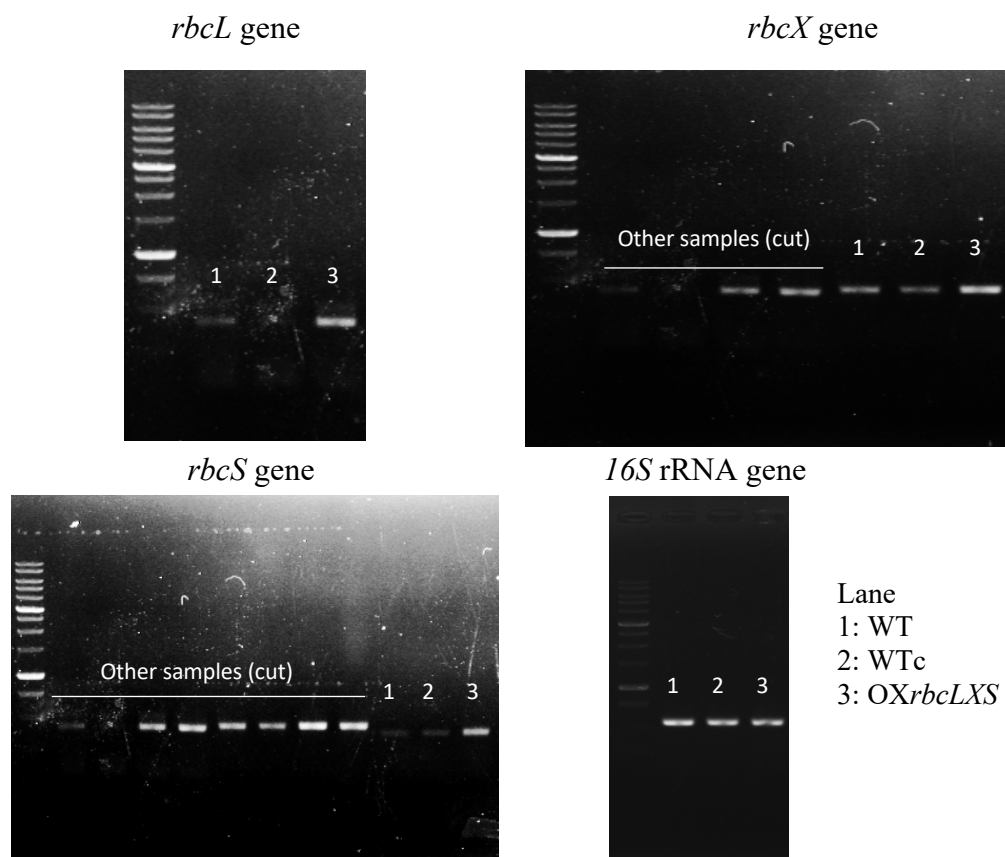

**Figure S3 :** Agarose gel electrophoresis of RT-PCR product of *phaA*, *phaB*, *phaC*, *phaE*, *plsX*, *plsC*, *rbcS*, *glgX*, and *16s* transcripts in *Synechocystis sp.* PCC 6803 grown under stresses and normal BG<sub>11</sub> condition, shown in **Figure 8**. The *16s* rRNA transcript was used as the reference.

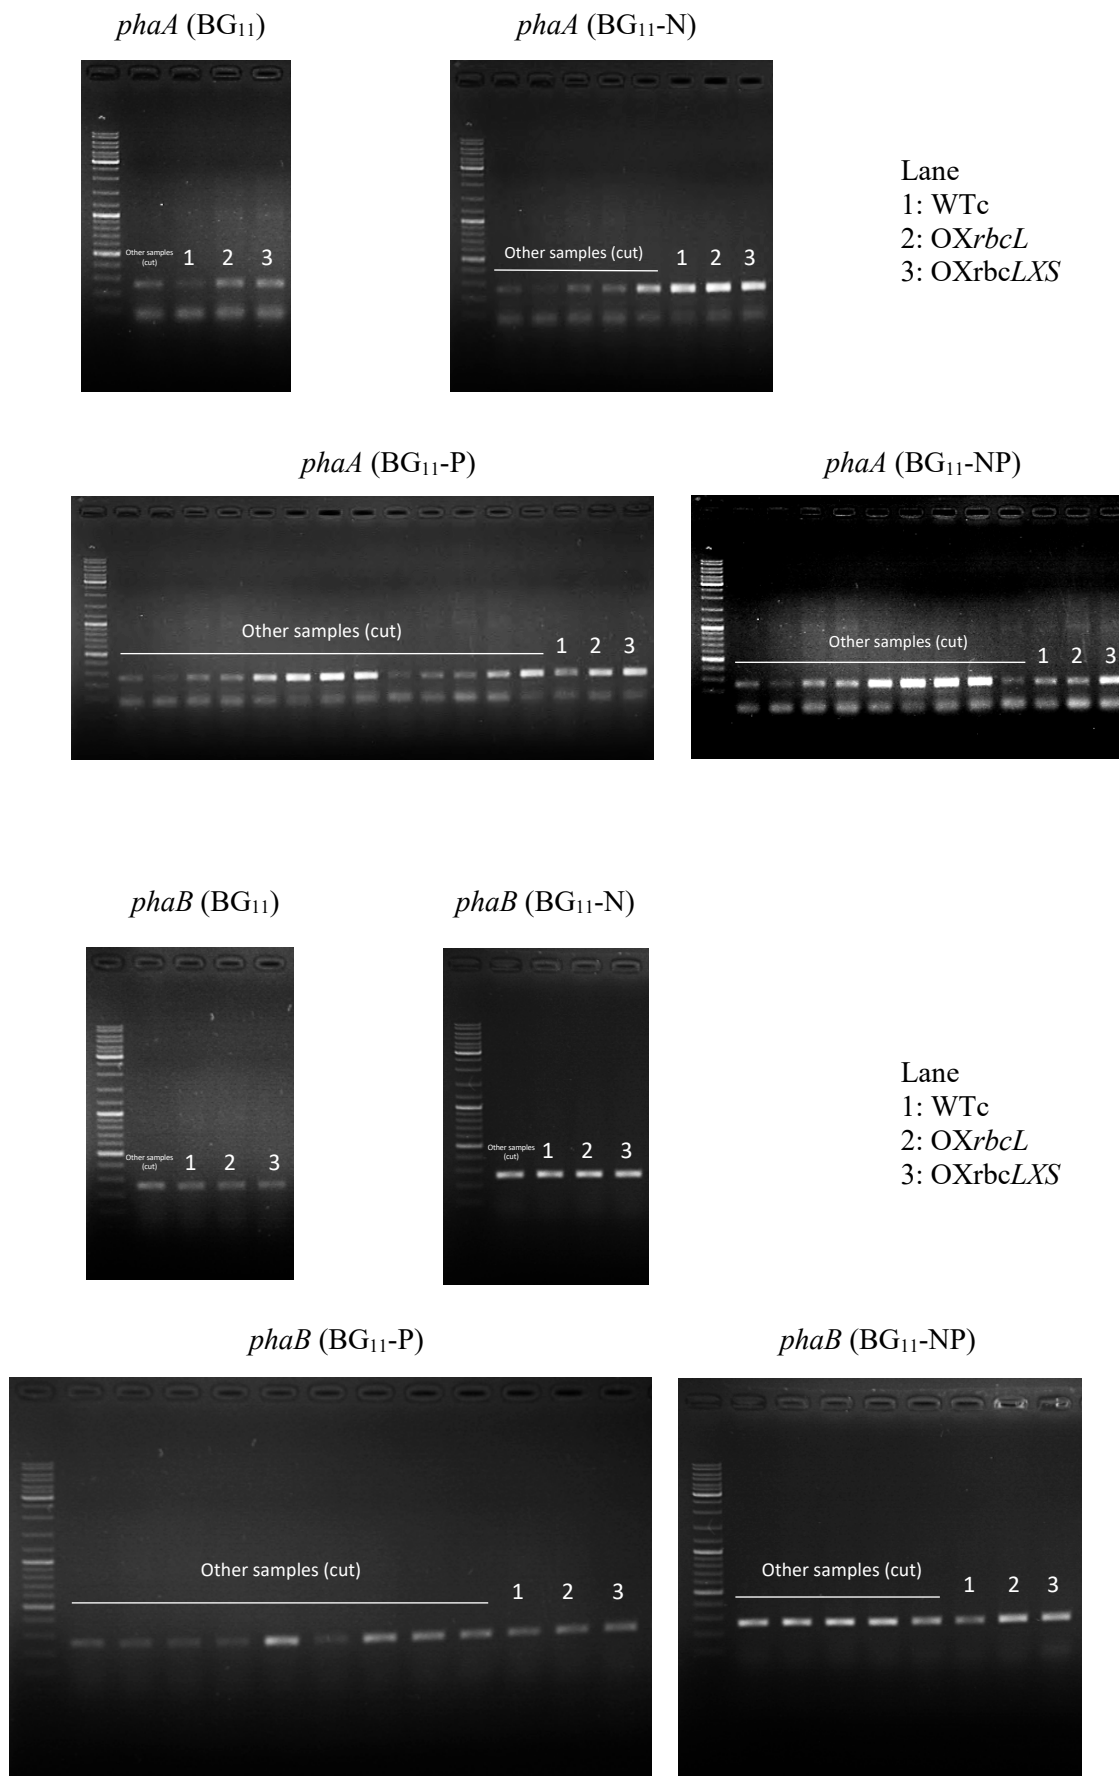

*phaC* (BG<sub>11</sub>)

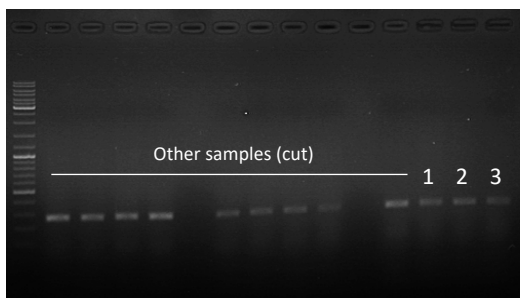

*phaC* (BG<sub>11</sub>-N)

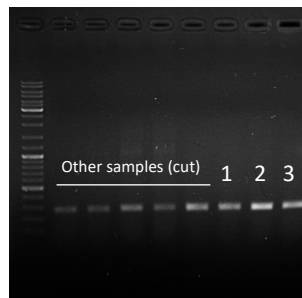

Lane  
1: WTc  
2: OX*rbcL*  
3: OX*rbcLXS*

*phaC* (BG<sub>11</sub>-P)

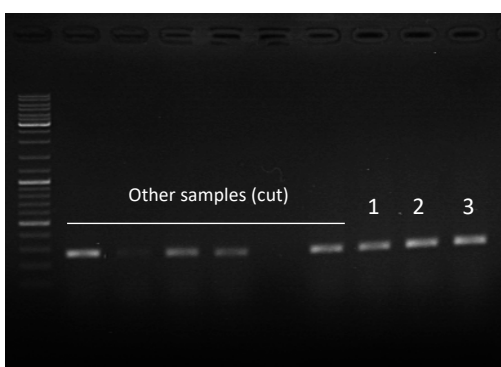

*phaC* (BG<sub>11</sub>-NP)

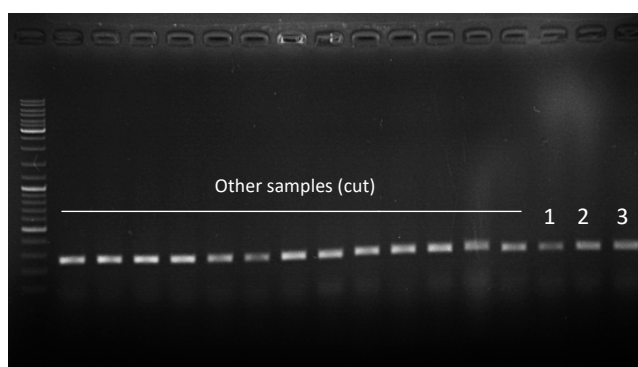

*phaE* (BG<sub>11</sub>)

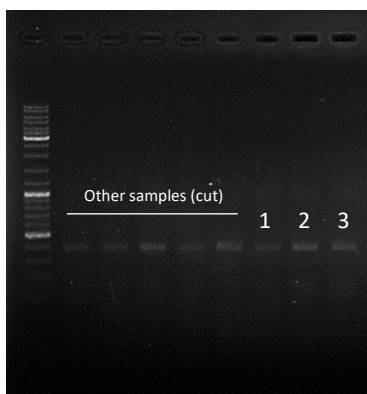

Lane  
1: WTc  
2: OX*rbcL*  
3: OX*rbcLXS*

*phaE* (BG<sub>11</sub>-N)

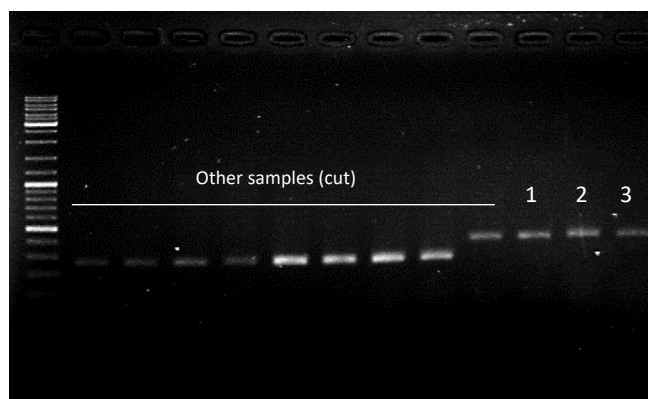

*phaE* (BG<sub>11</sub>-P)

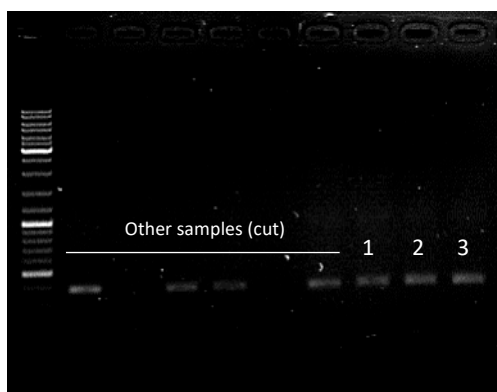

*phaE* (BG<sub>11</sub>-NP)

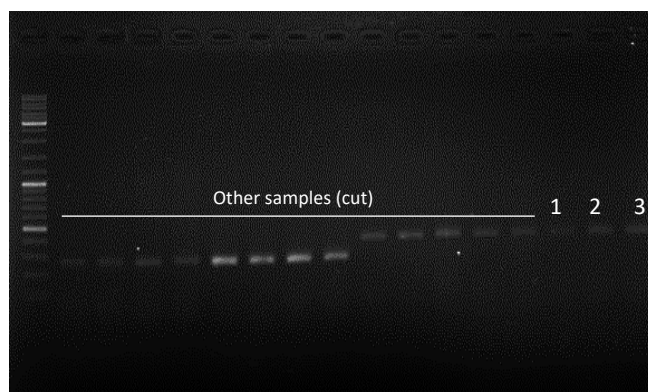

*plsX* (BG<sub>11</sub>)

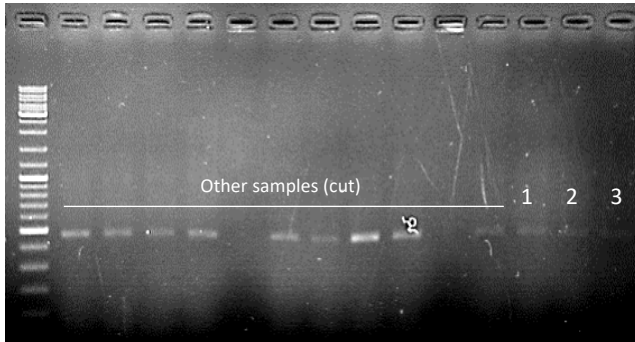

*plsX* (BG<sub>11</sub>-N)

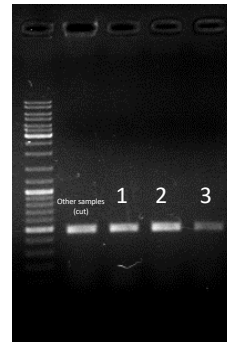

Lane  
1: WTc  
2: OX*rbcL*  
3: OX*rbcLXS*

*plsX* (BG<sub>11</sub>-P)

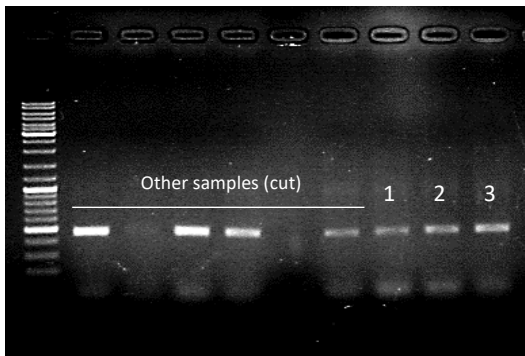

*plsX* (BG<sub>11</sub>-NP)

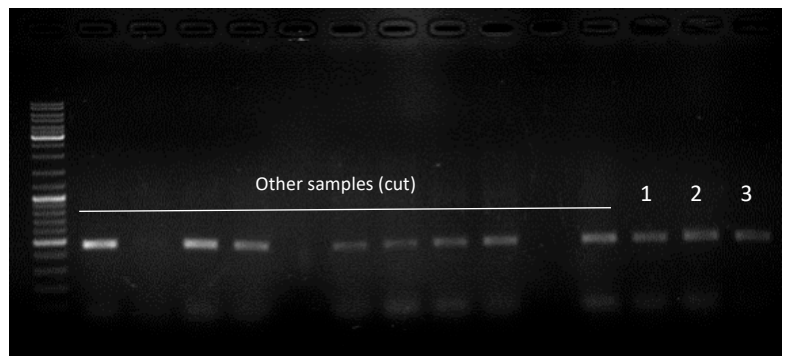

*plsC* (BG<sub>11</sub>)

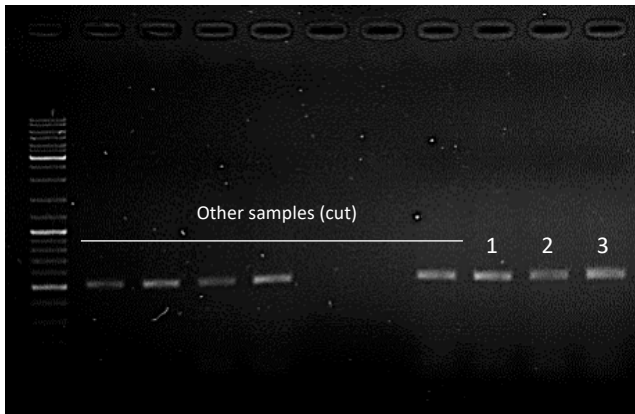

*plsC* (BG<sub>11</sub>-N)

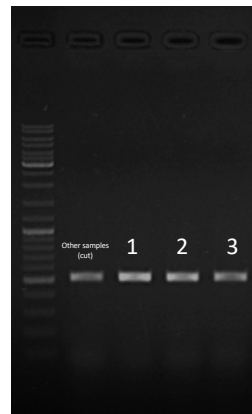

Lane  
1: WTc  
2: OX*rbcL*  
3: OX*rbcLXS*

*plsC* (BG<sub>11</sub>-P)

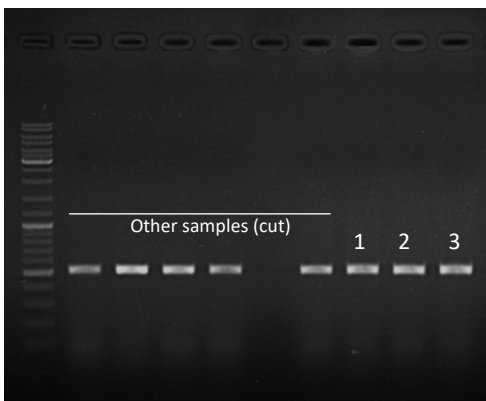

*plsC* (BG<sub>11</sub>-NP)

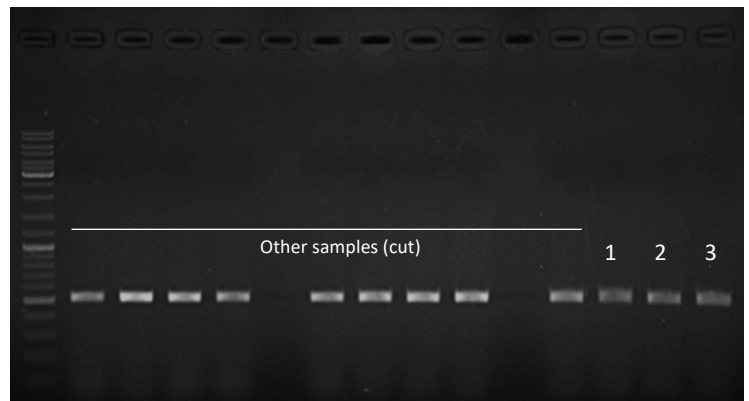

*glgX* (BG<sub>11</sub>)

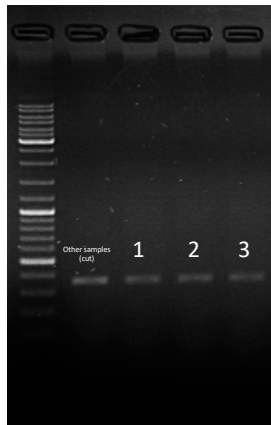

*glgX* (BG<sub>11</sub>-N)

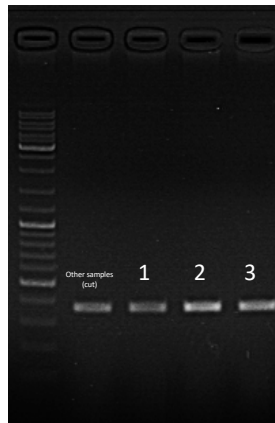

Lane  
1: WTc  
2: OX*rbcL*  
3: OX*rbcLXS*

*glgX* (BG<sub>11</sub>-P)

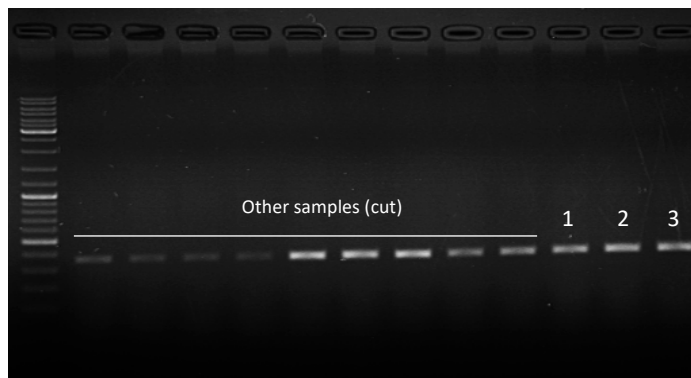

*glgX* (BG<sub>11</sub>-NP)

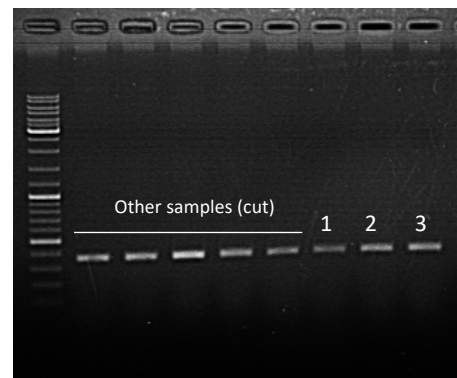

*16S* rRNA (BG<sub>11</sub>)

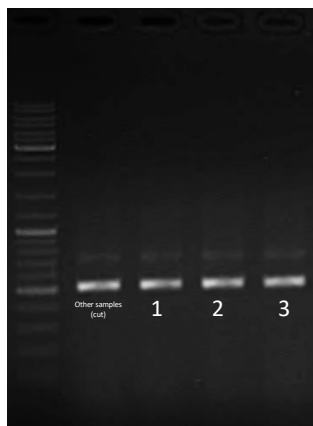

*16S* rRNA (BG<sub>11</sub>-N)

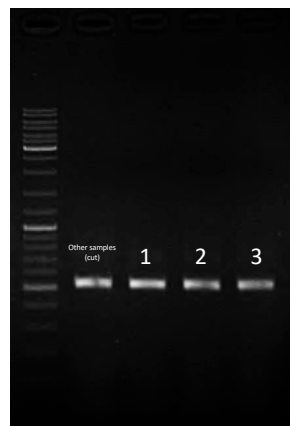

Lane  
1: WTc  
2: OX*rbcL*  
3: OX*rbcLXS*

*16S* rRNA (BG<sub>11</sub>-P)

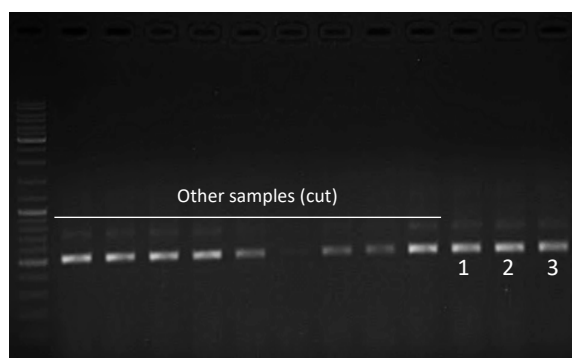

*16S* rRNA (BG<sub>11</sub>-NP)

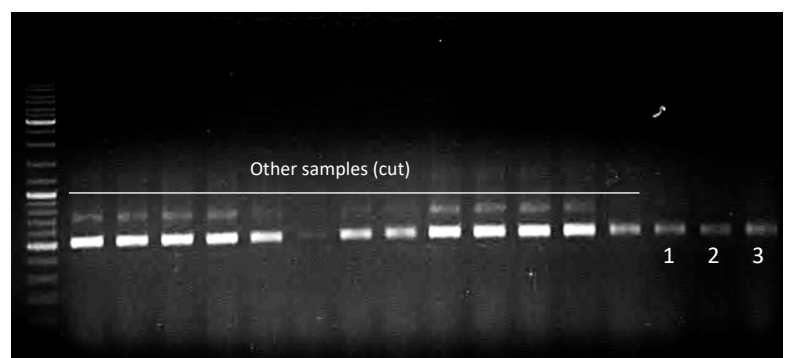

Supplement: s1 [file s1]
